# Supplementary material for: Neuroprotective mechanism of TMP269, a selective class IIA histone deacetylase inhibitor, after cerebral ischemia/reperfusion injury
Source: PubMed Central journal article supplement — Neural Regen Res. 2019 Sep 24;15(2):277–84. doi: 10.4103/1673-5374.265562 (PMC6905324; doi:10.4103/1673-5374.265562), 2019-09-24
Supplement: NRR-15-277_Suppl1.pdf [file NRR-15-277_Suppl1.pdf]

## OPEN PEER REVIEW REPORT 1

**Reviewer:** Sidharth Mehan, Rajendra Institute of Technology & Sciences, India.

**Comments to the authors:**

1. With reference to proposed drug TMP269, future perspective is not significantly explored.
2. Lack of Pharmacokinetic parameters.
3. Standard comparison group is must.
4. Clinical relevancy with respect to TMP269 is very less in review and reference part.
5. Lack of specific biochemical markers.
