# Supplementary material for: Neuroprotective mechanism of TMP269, a selective class IIA histone deacetylase inhibitor, after cerebral ischemia/reperfusion injury
Source: PubMed Central journal article supplement — Neural Regen Res. 2019 Sep 24;15(2):277–84. doi: 10.4103/1673-5374.265562 (PMC6905324; doi:10.4103/1673-5374.265562), 2019-09-24
Supplement: NRR-15-277_Suppl2.pdf [file NRR-15-277_Suppl2.pdf]

## OPEN PEER REVIEW REPORT 2

**Reviewer:** Min Ye, Nanjing Benq hospital, China.

**Comments to authors:**

1. P8, the expression of "TMP269 contributed to abnormal endothelial cell permeability" is not proper. From the description, TMP269 actually counteracted the abnormal endothelial cell permeability.
2. Figure 2: there is no I/R group in the pictures of brain tissue. It is different between MCAO and I/R group, why not use I/R group as shown in other figures?
3. Table 1: there is no Sham group.
4. The effects of 10 and 16 mg/kg TMP269 were not good as 4 mg/kg. These should be discussed.
5. Some format errors, such as  $P < 0.05$  should be  $P < 0.05$ , 4mg/kg should be 4 mg/kg.
